# Supplementary figures and images for: 5-Lipoxygenase, but Not 12/15-Lipoxygenase, Contributes to Degeneration of Retinal Capillaries in a Mouse Model of Diabetic Retinopathy
Source: Oxford University Press journal article supplement (doi:10.2337/db07-1217), 2008-03-18

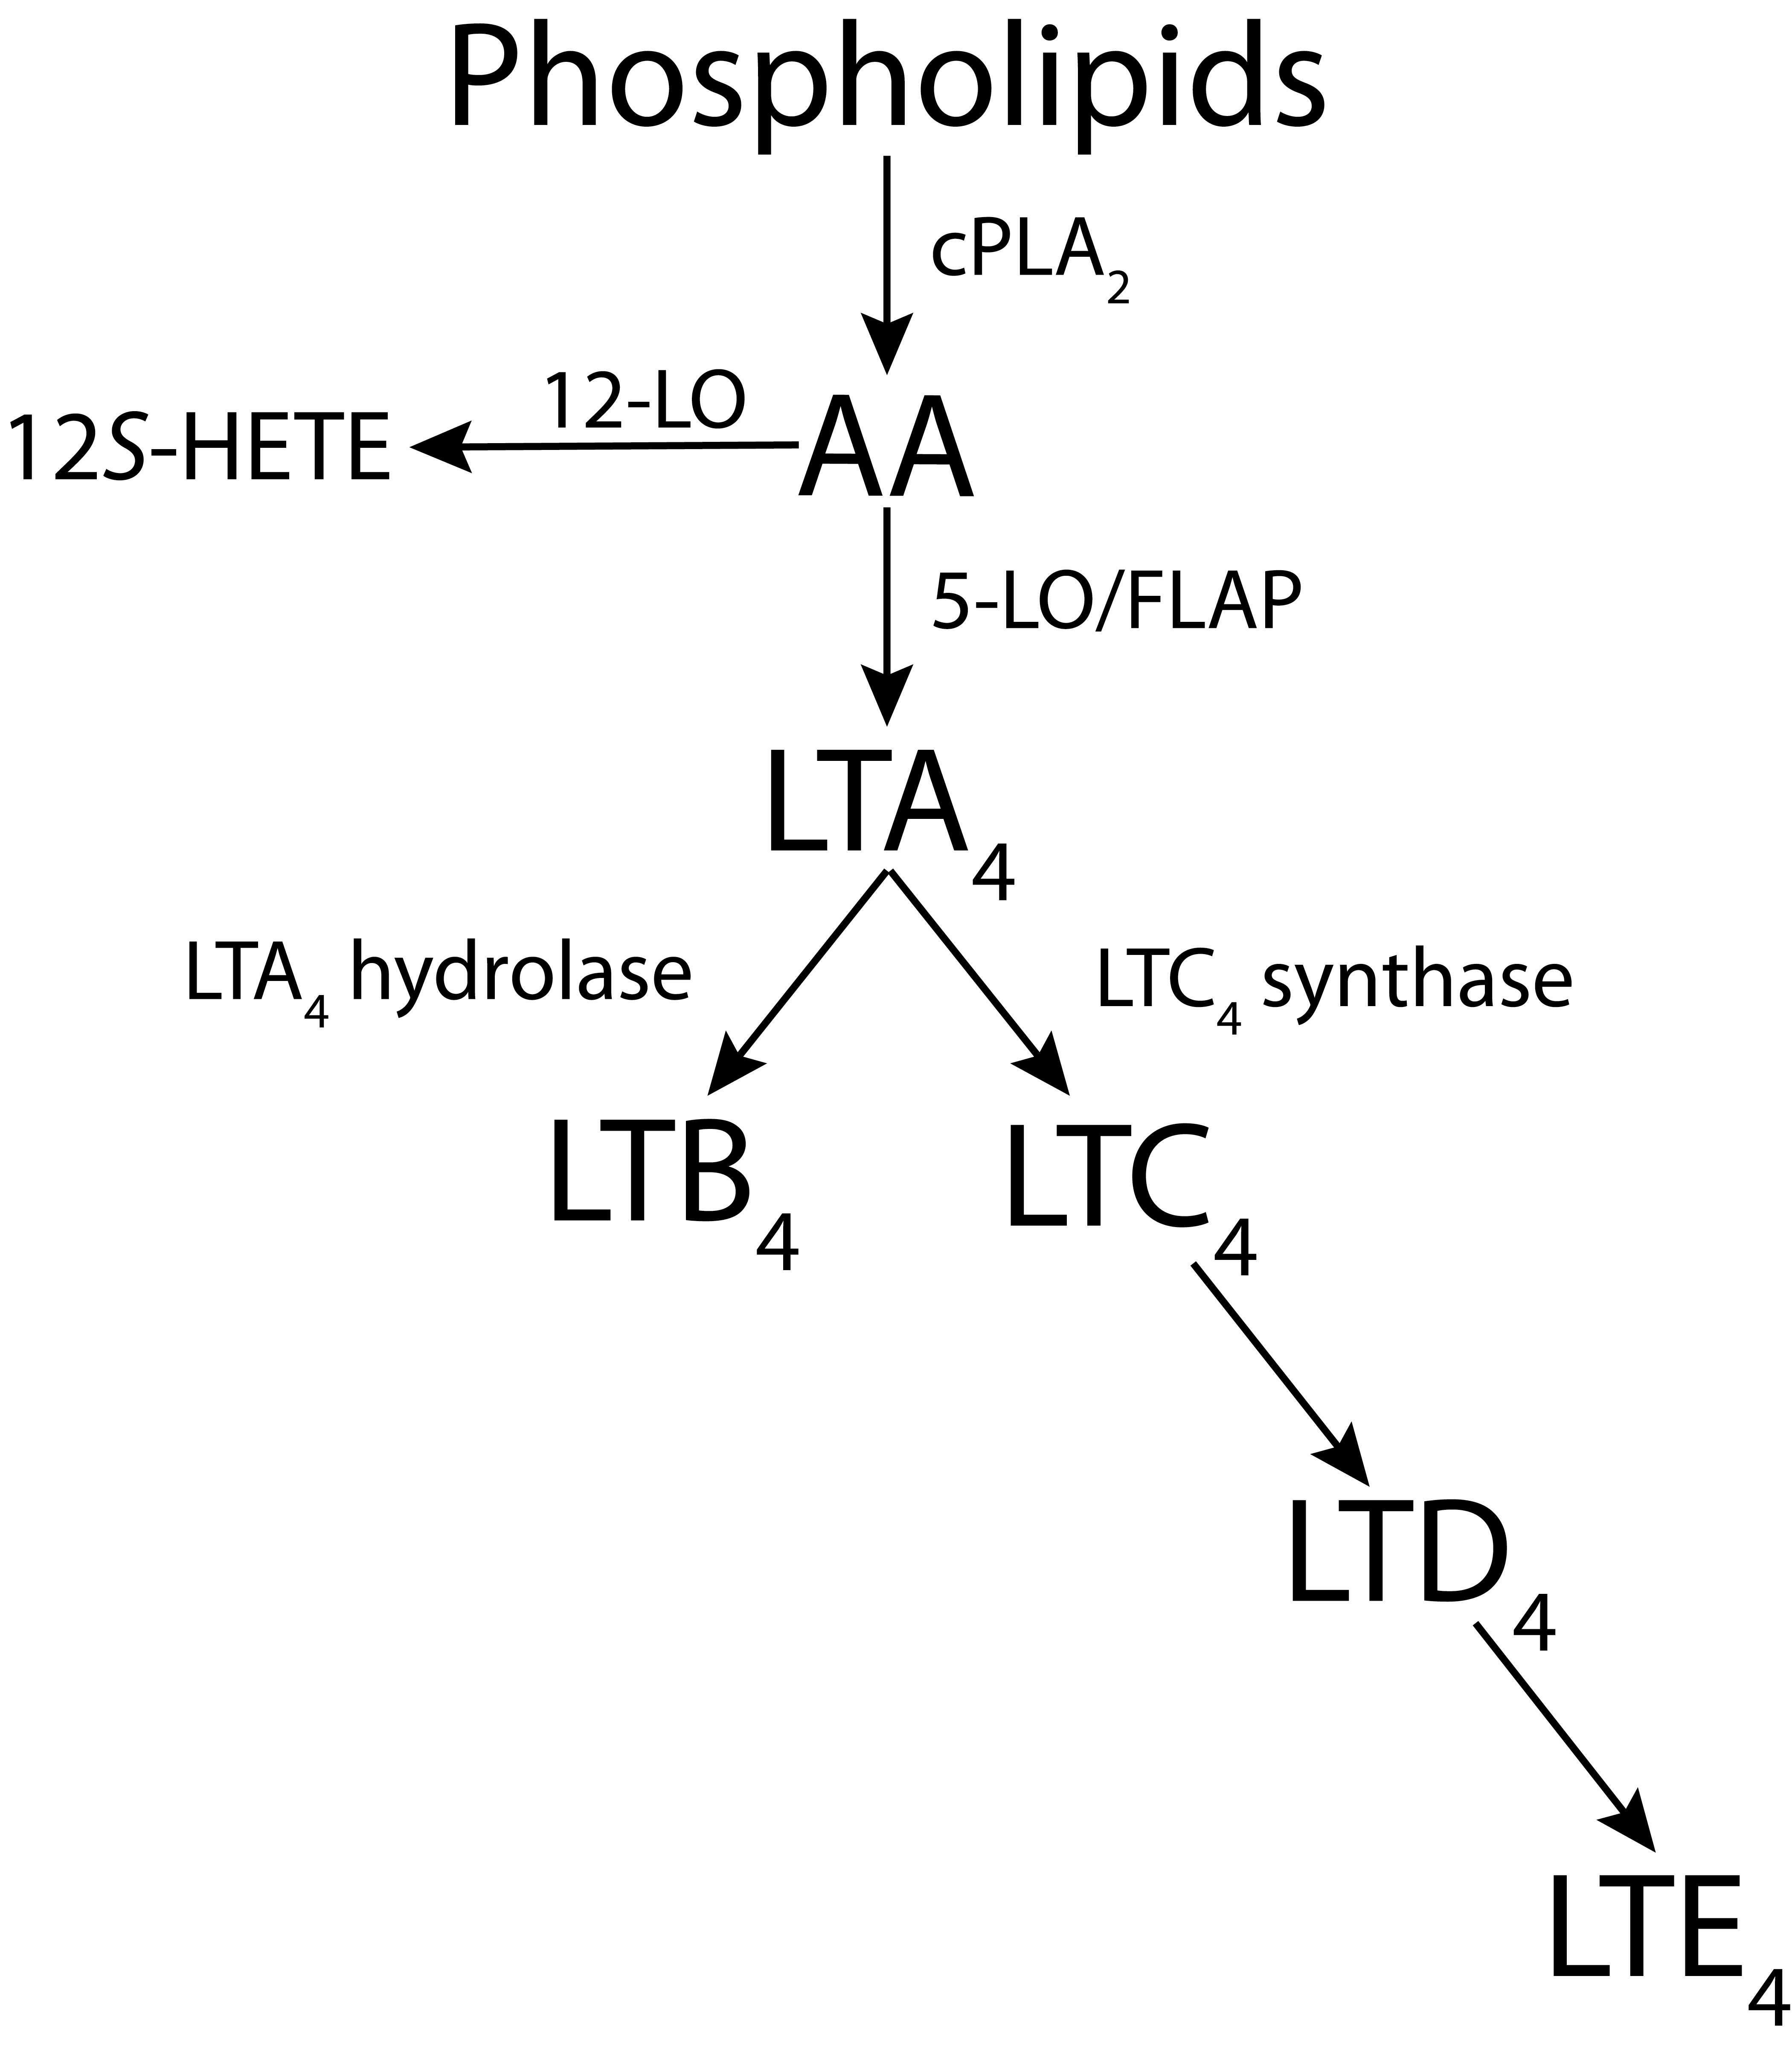


**FIGURE 1**

**
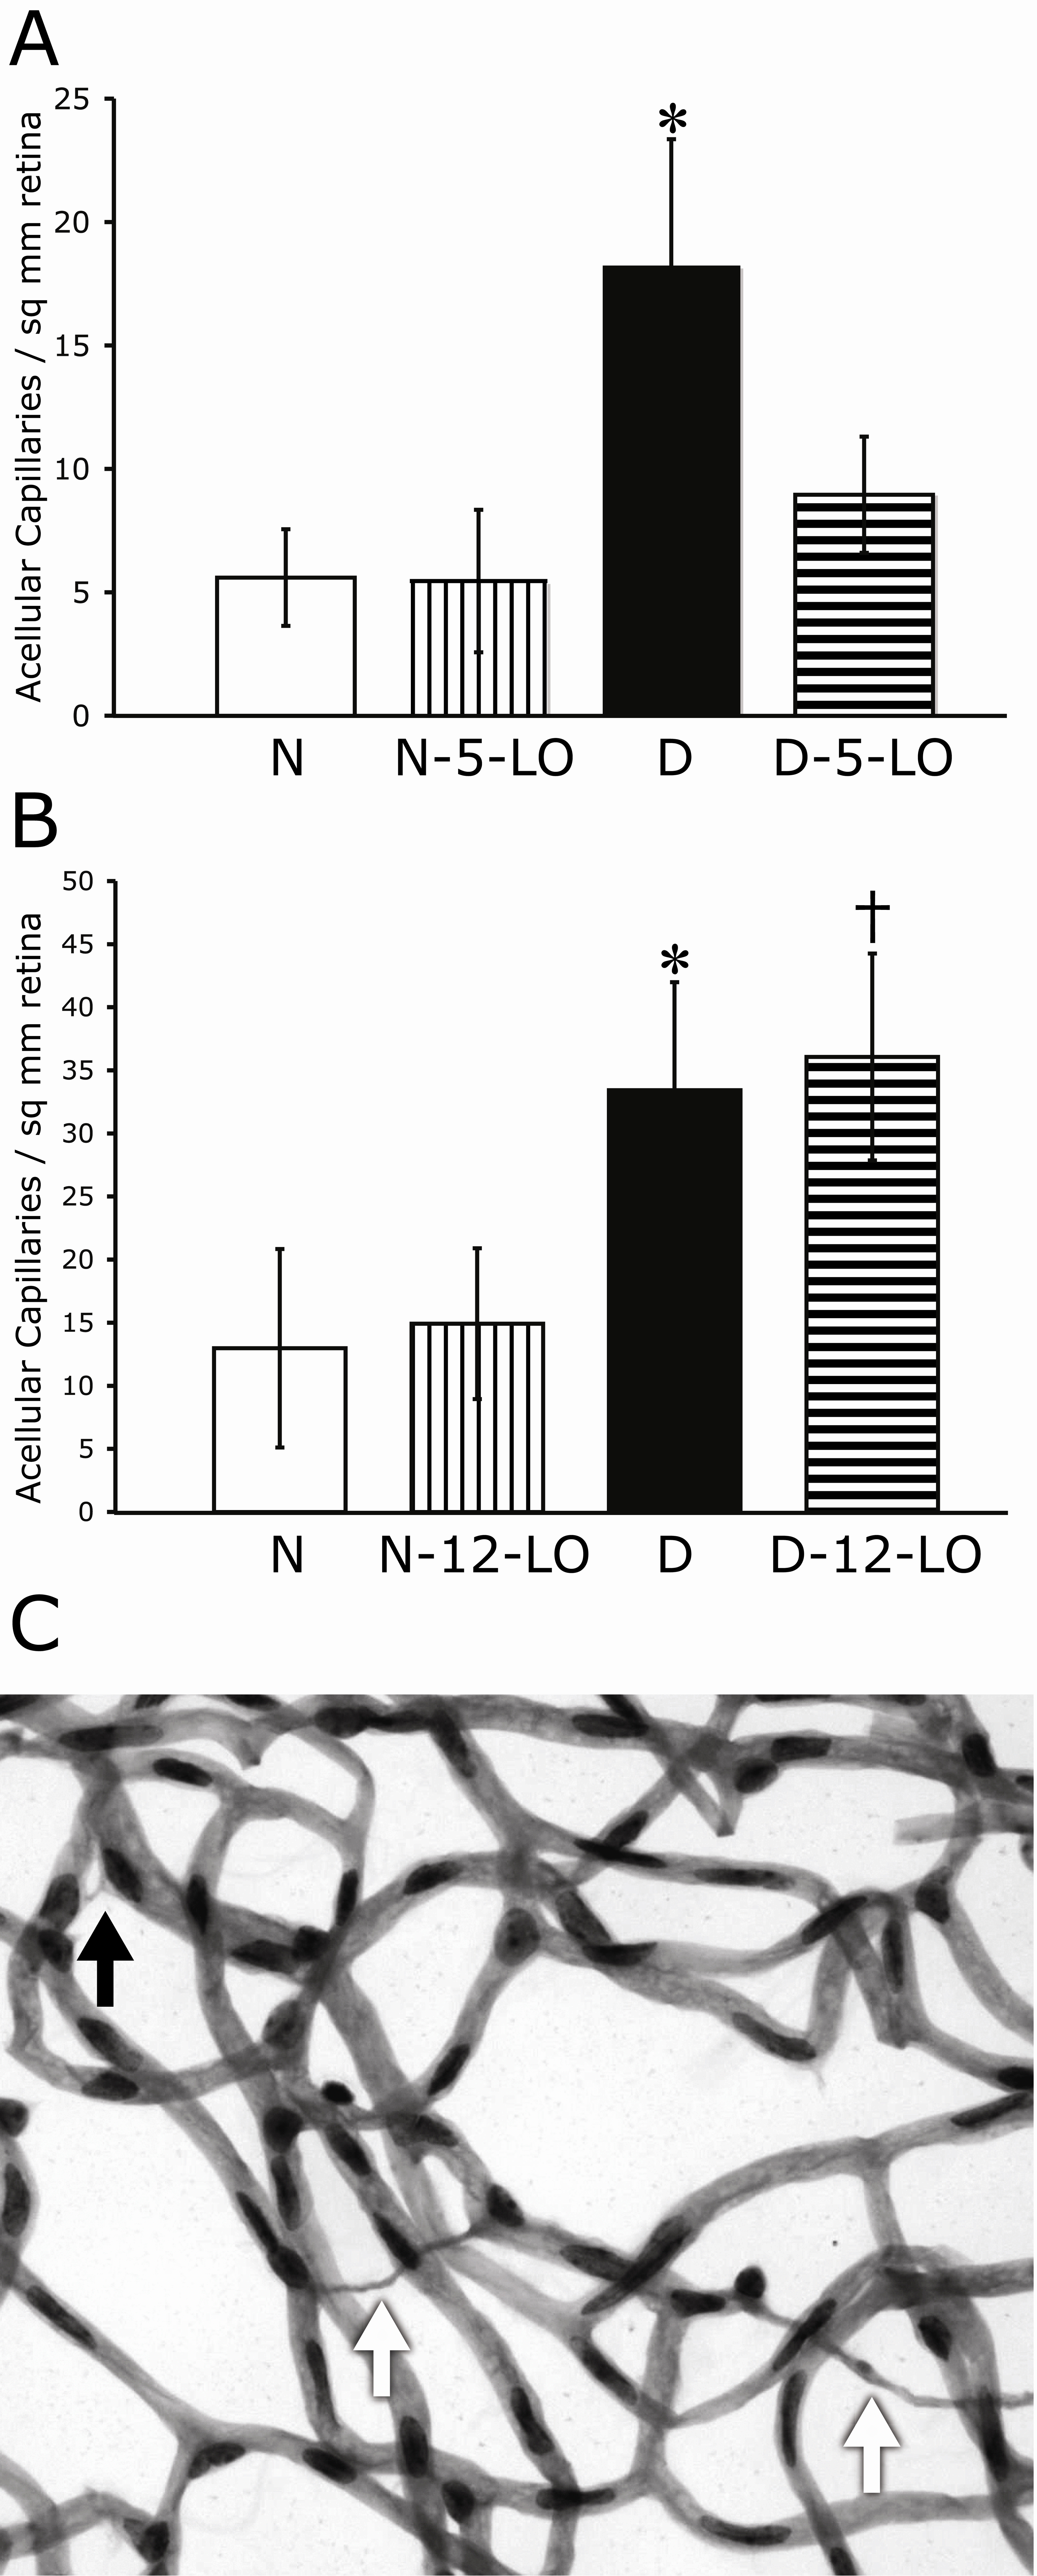
 FIGURE 2**

**
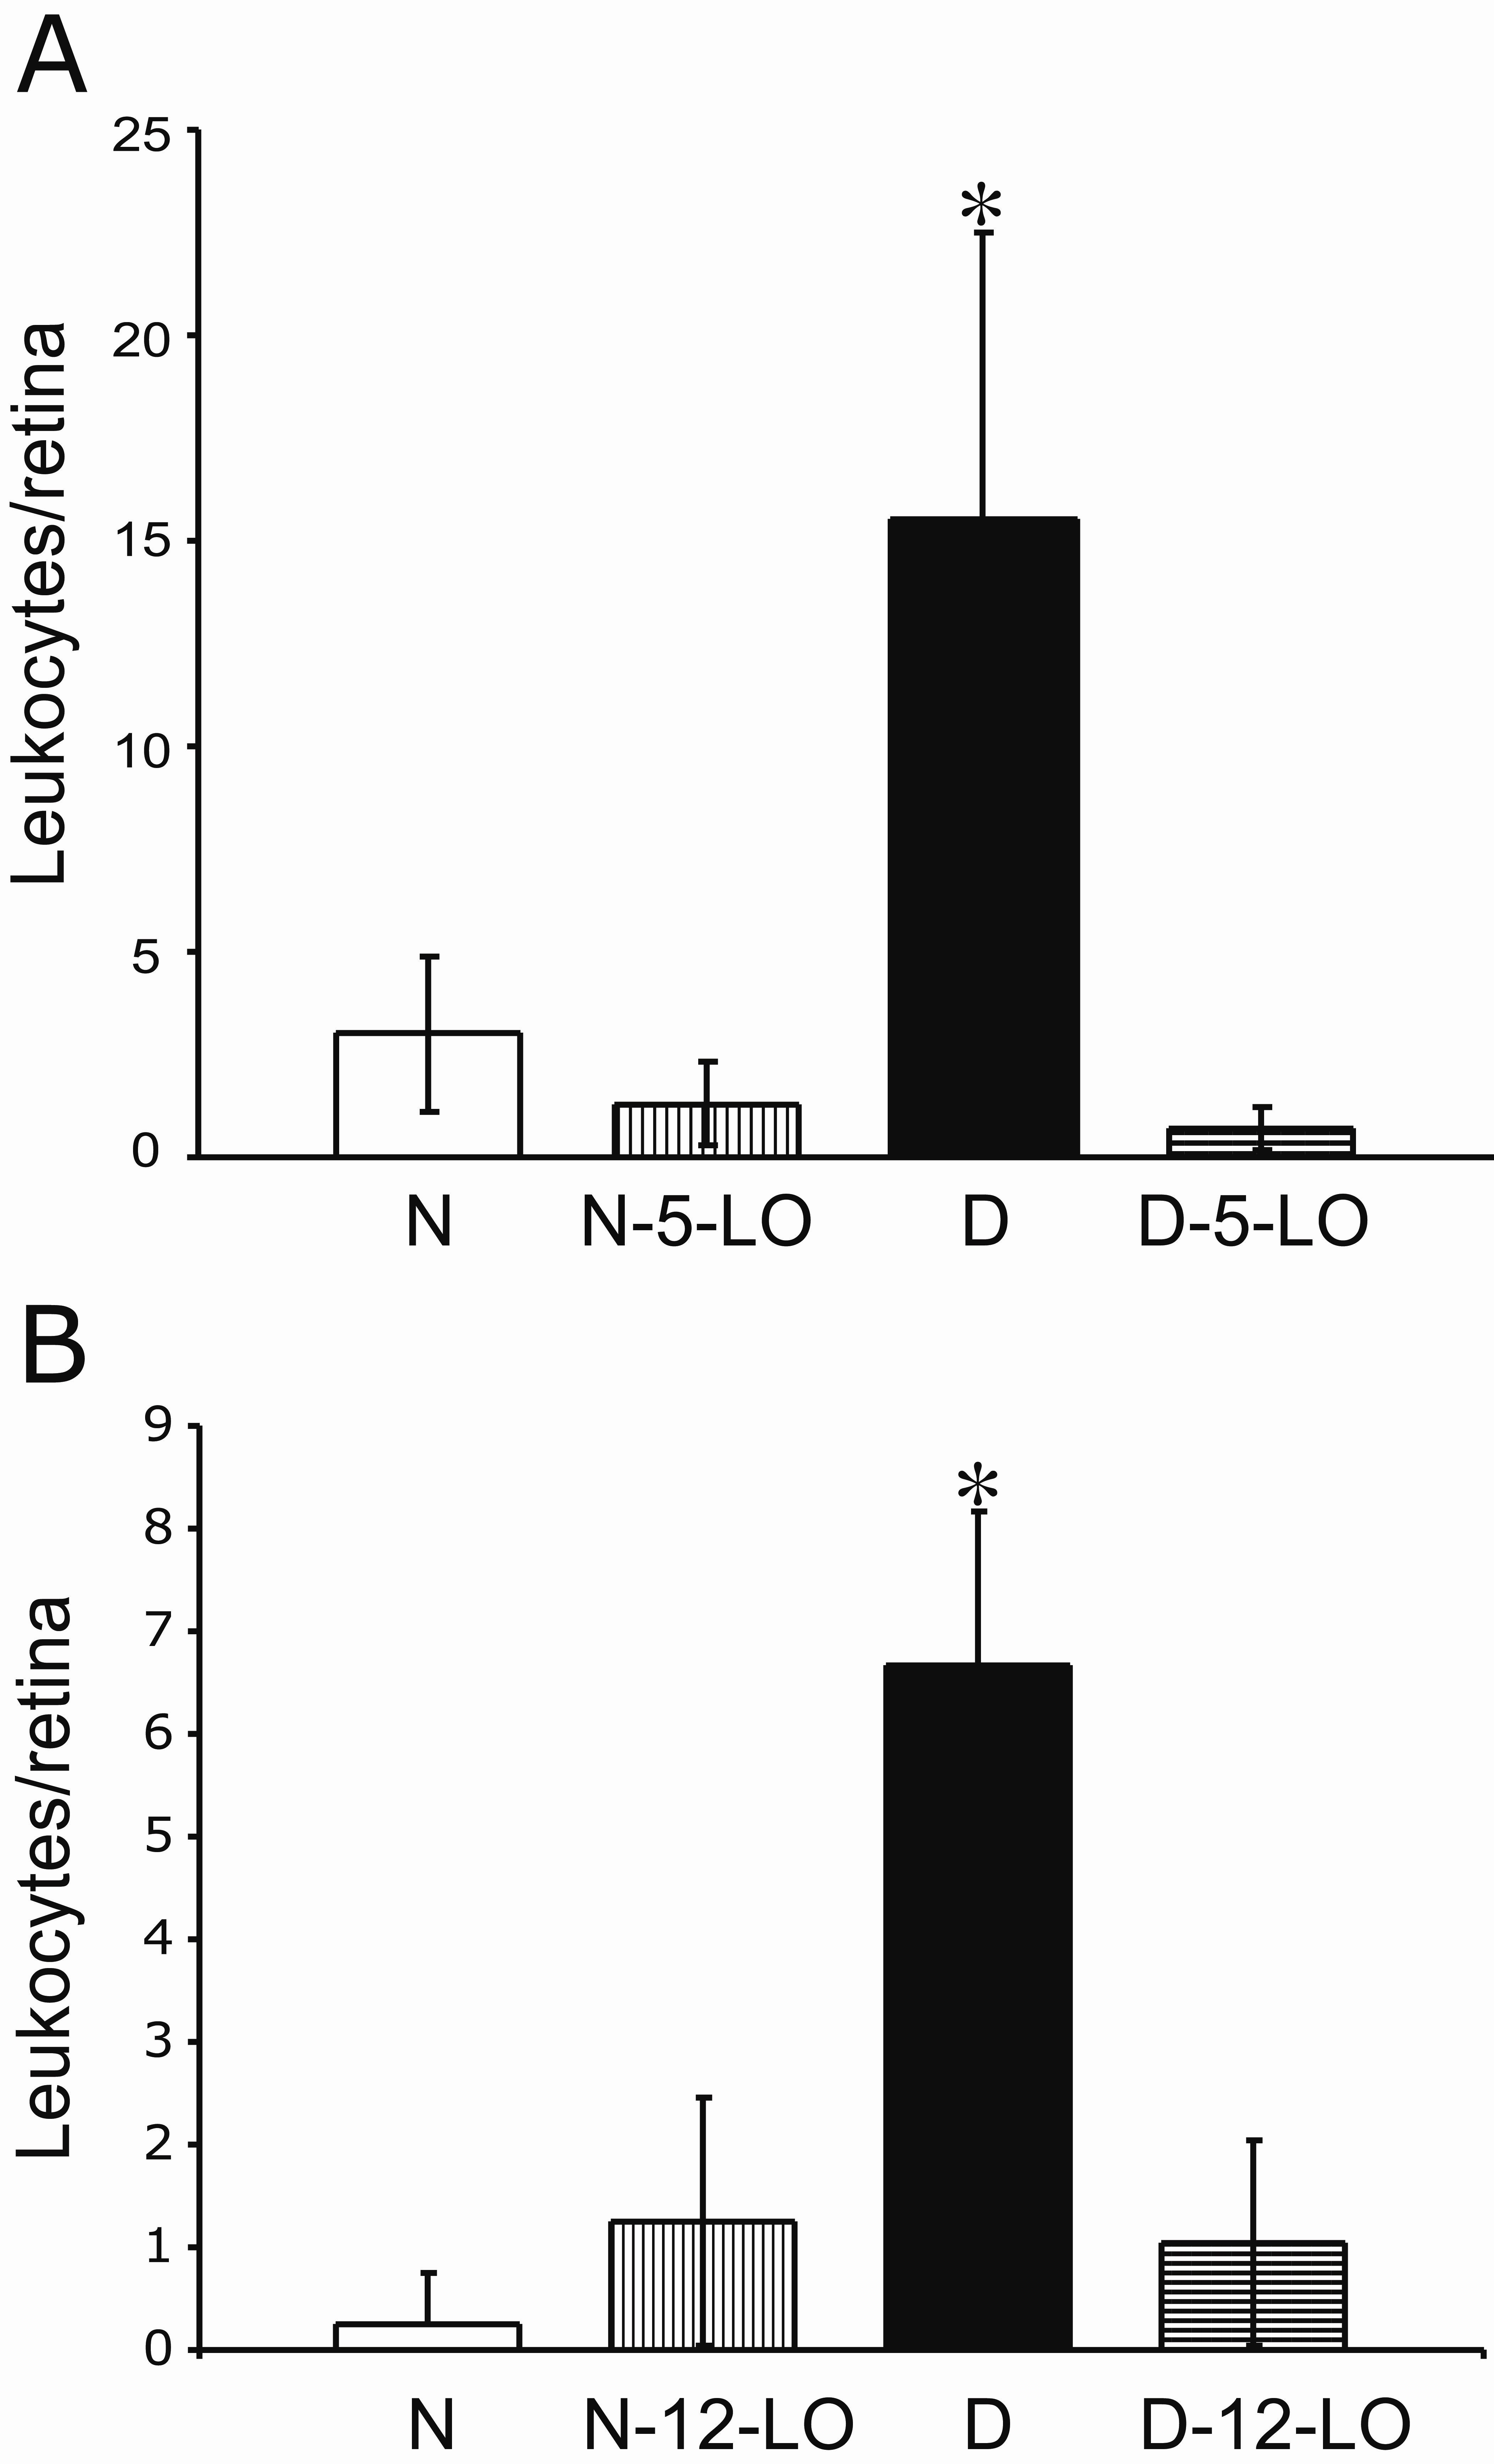
**

**FIGURE 3**

**
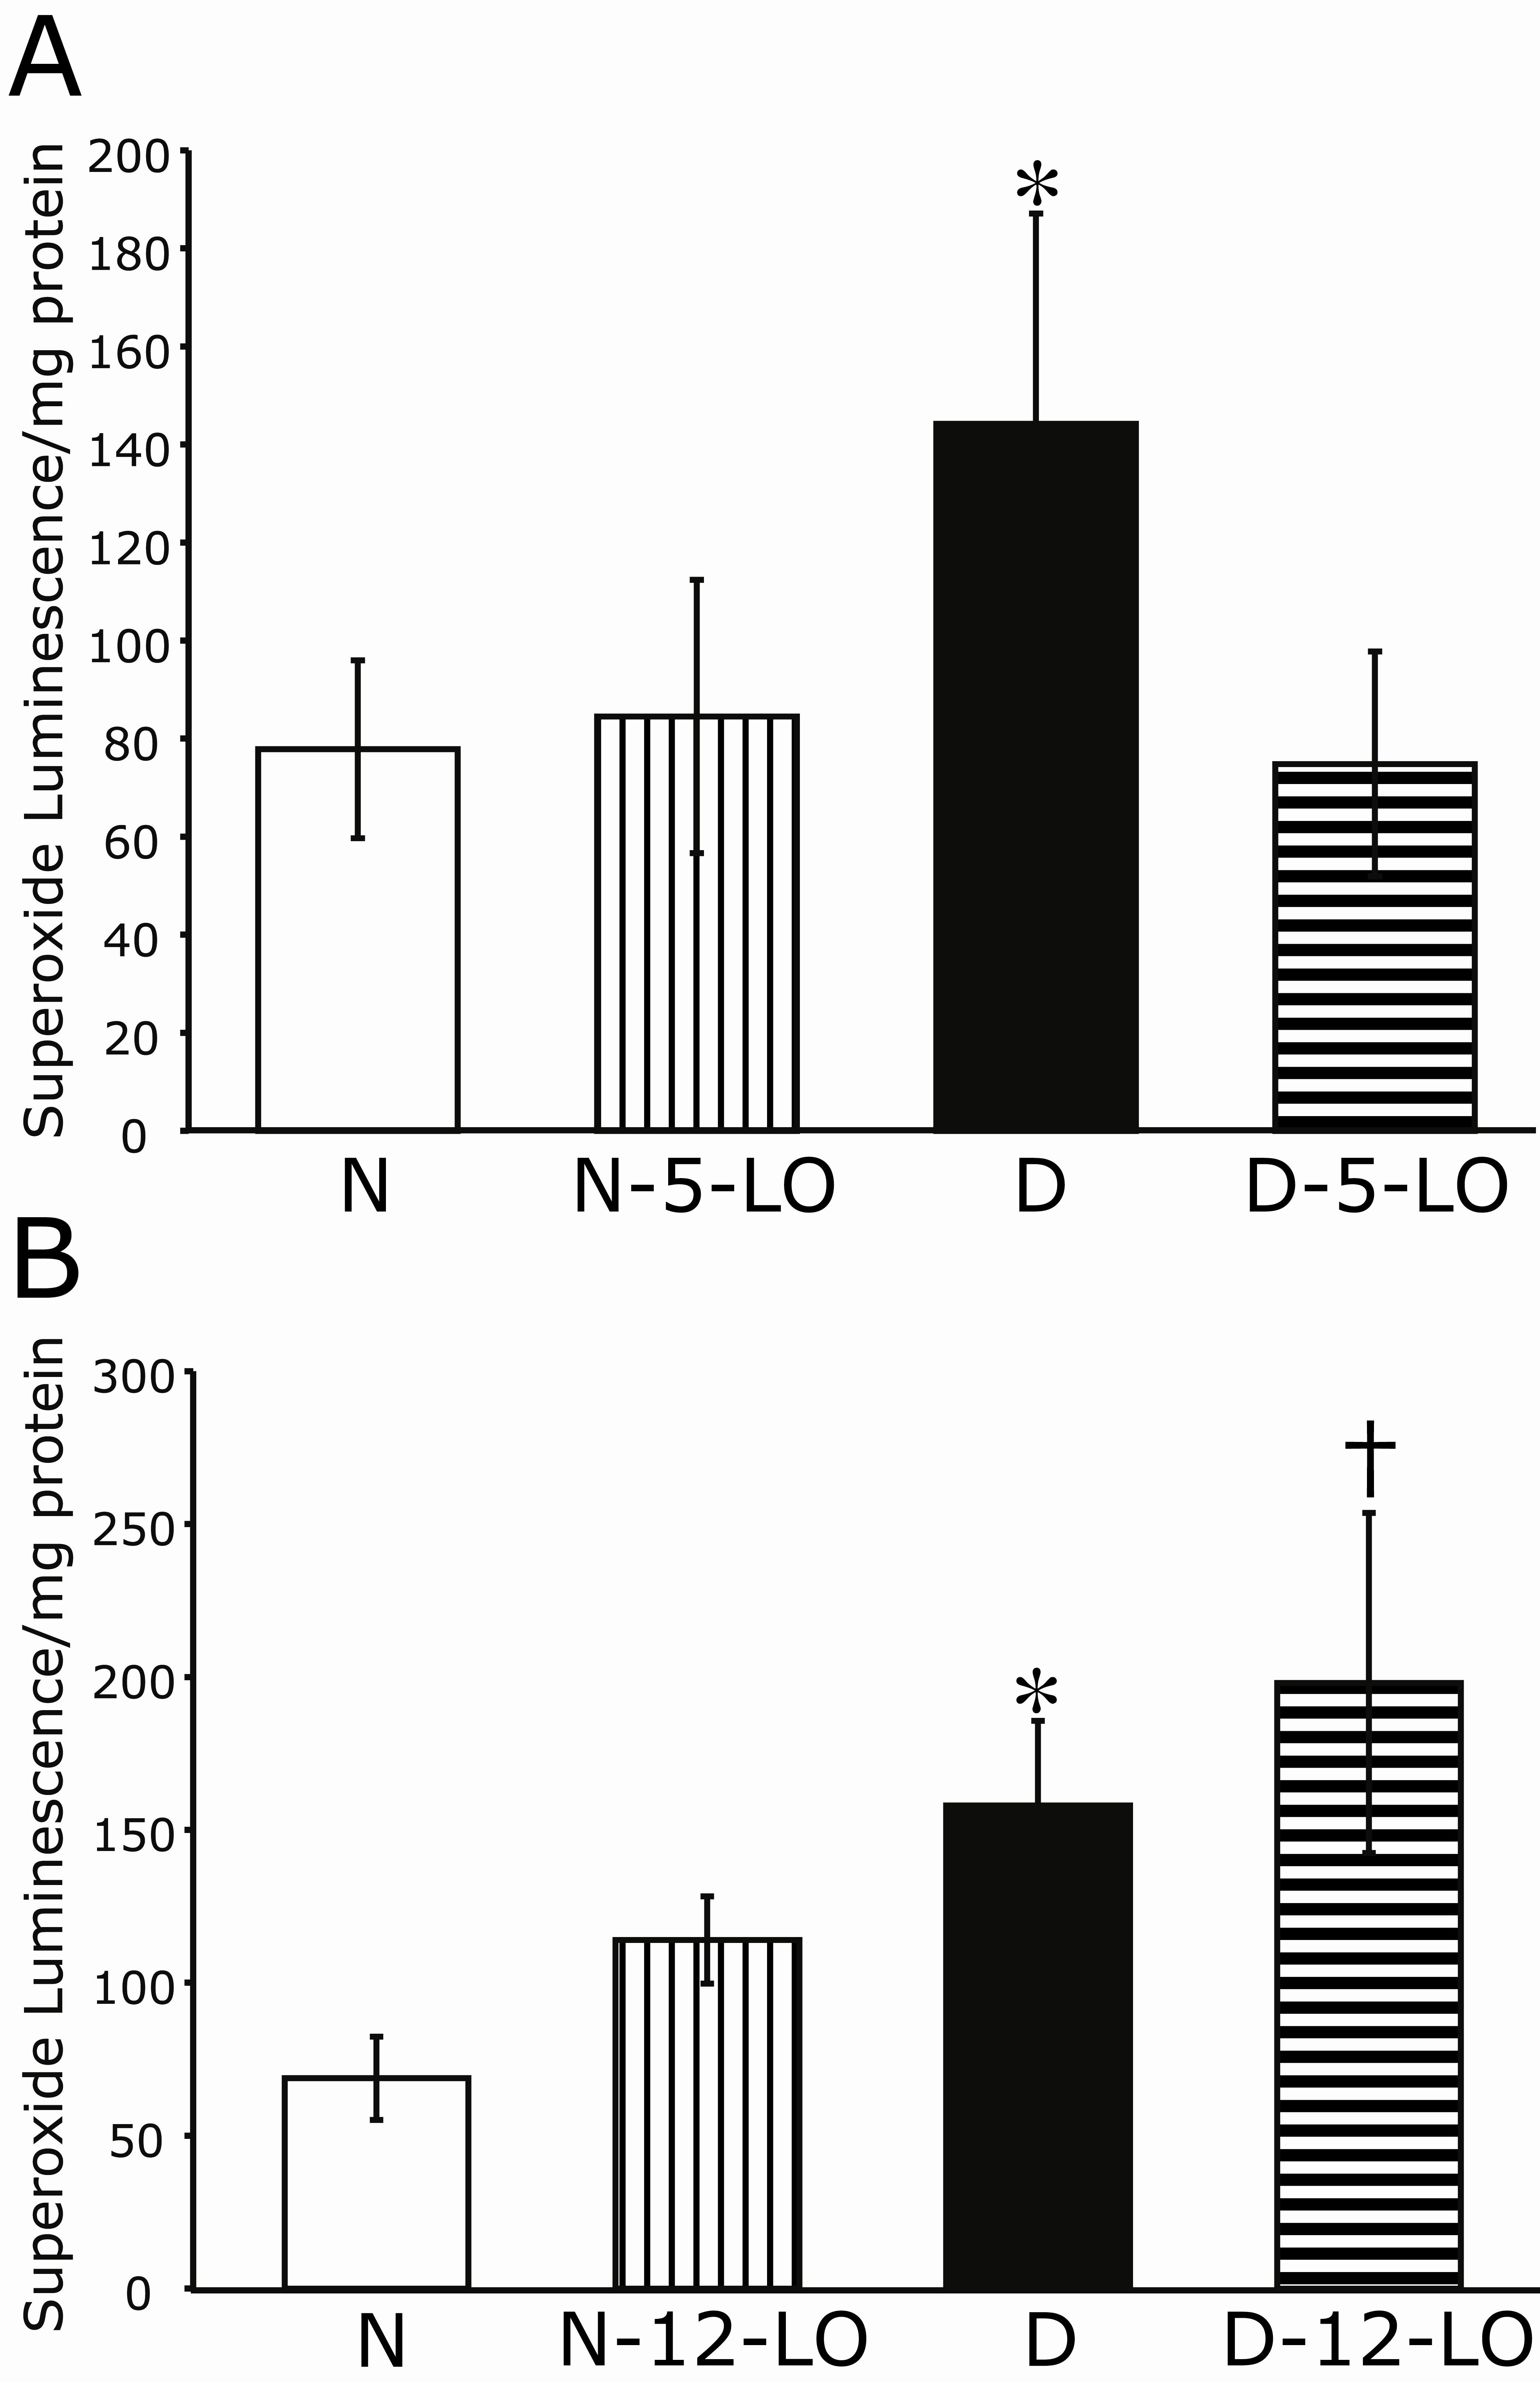
**

**FIGURE 4**

**
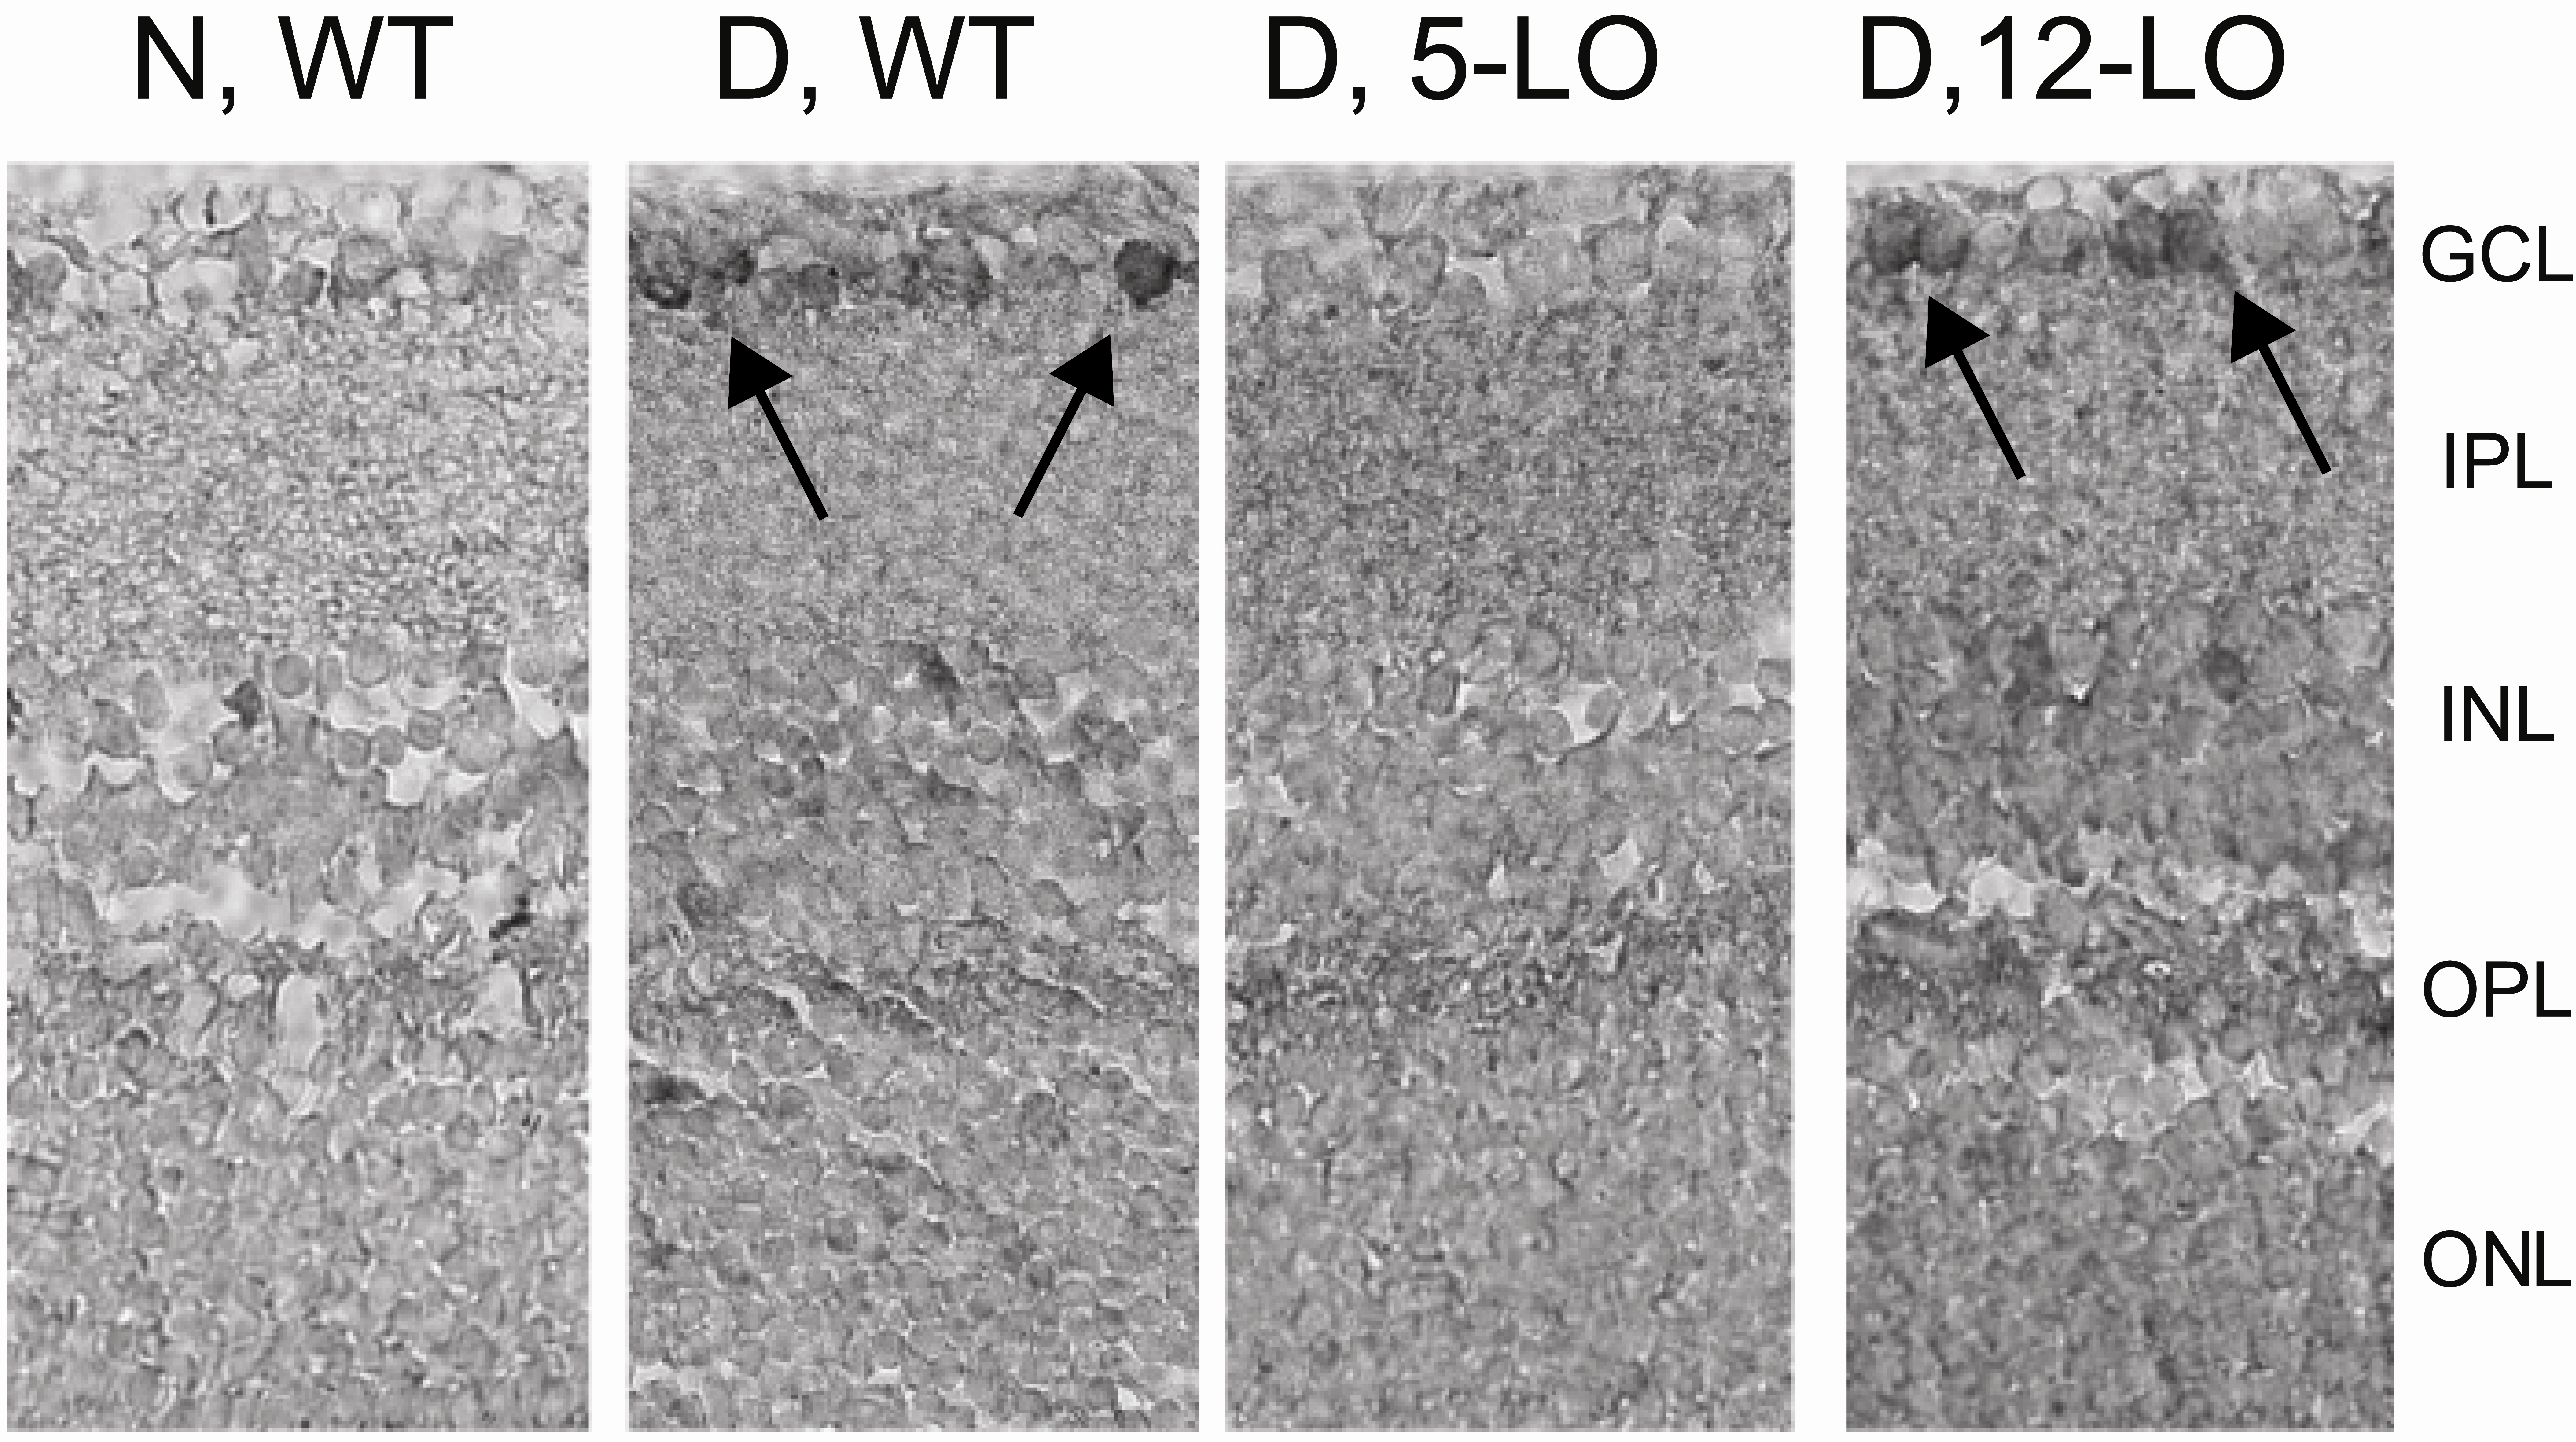
**

**FIGURE 5**

**
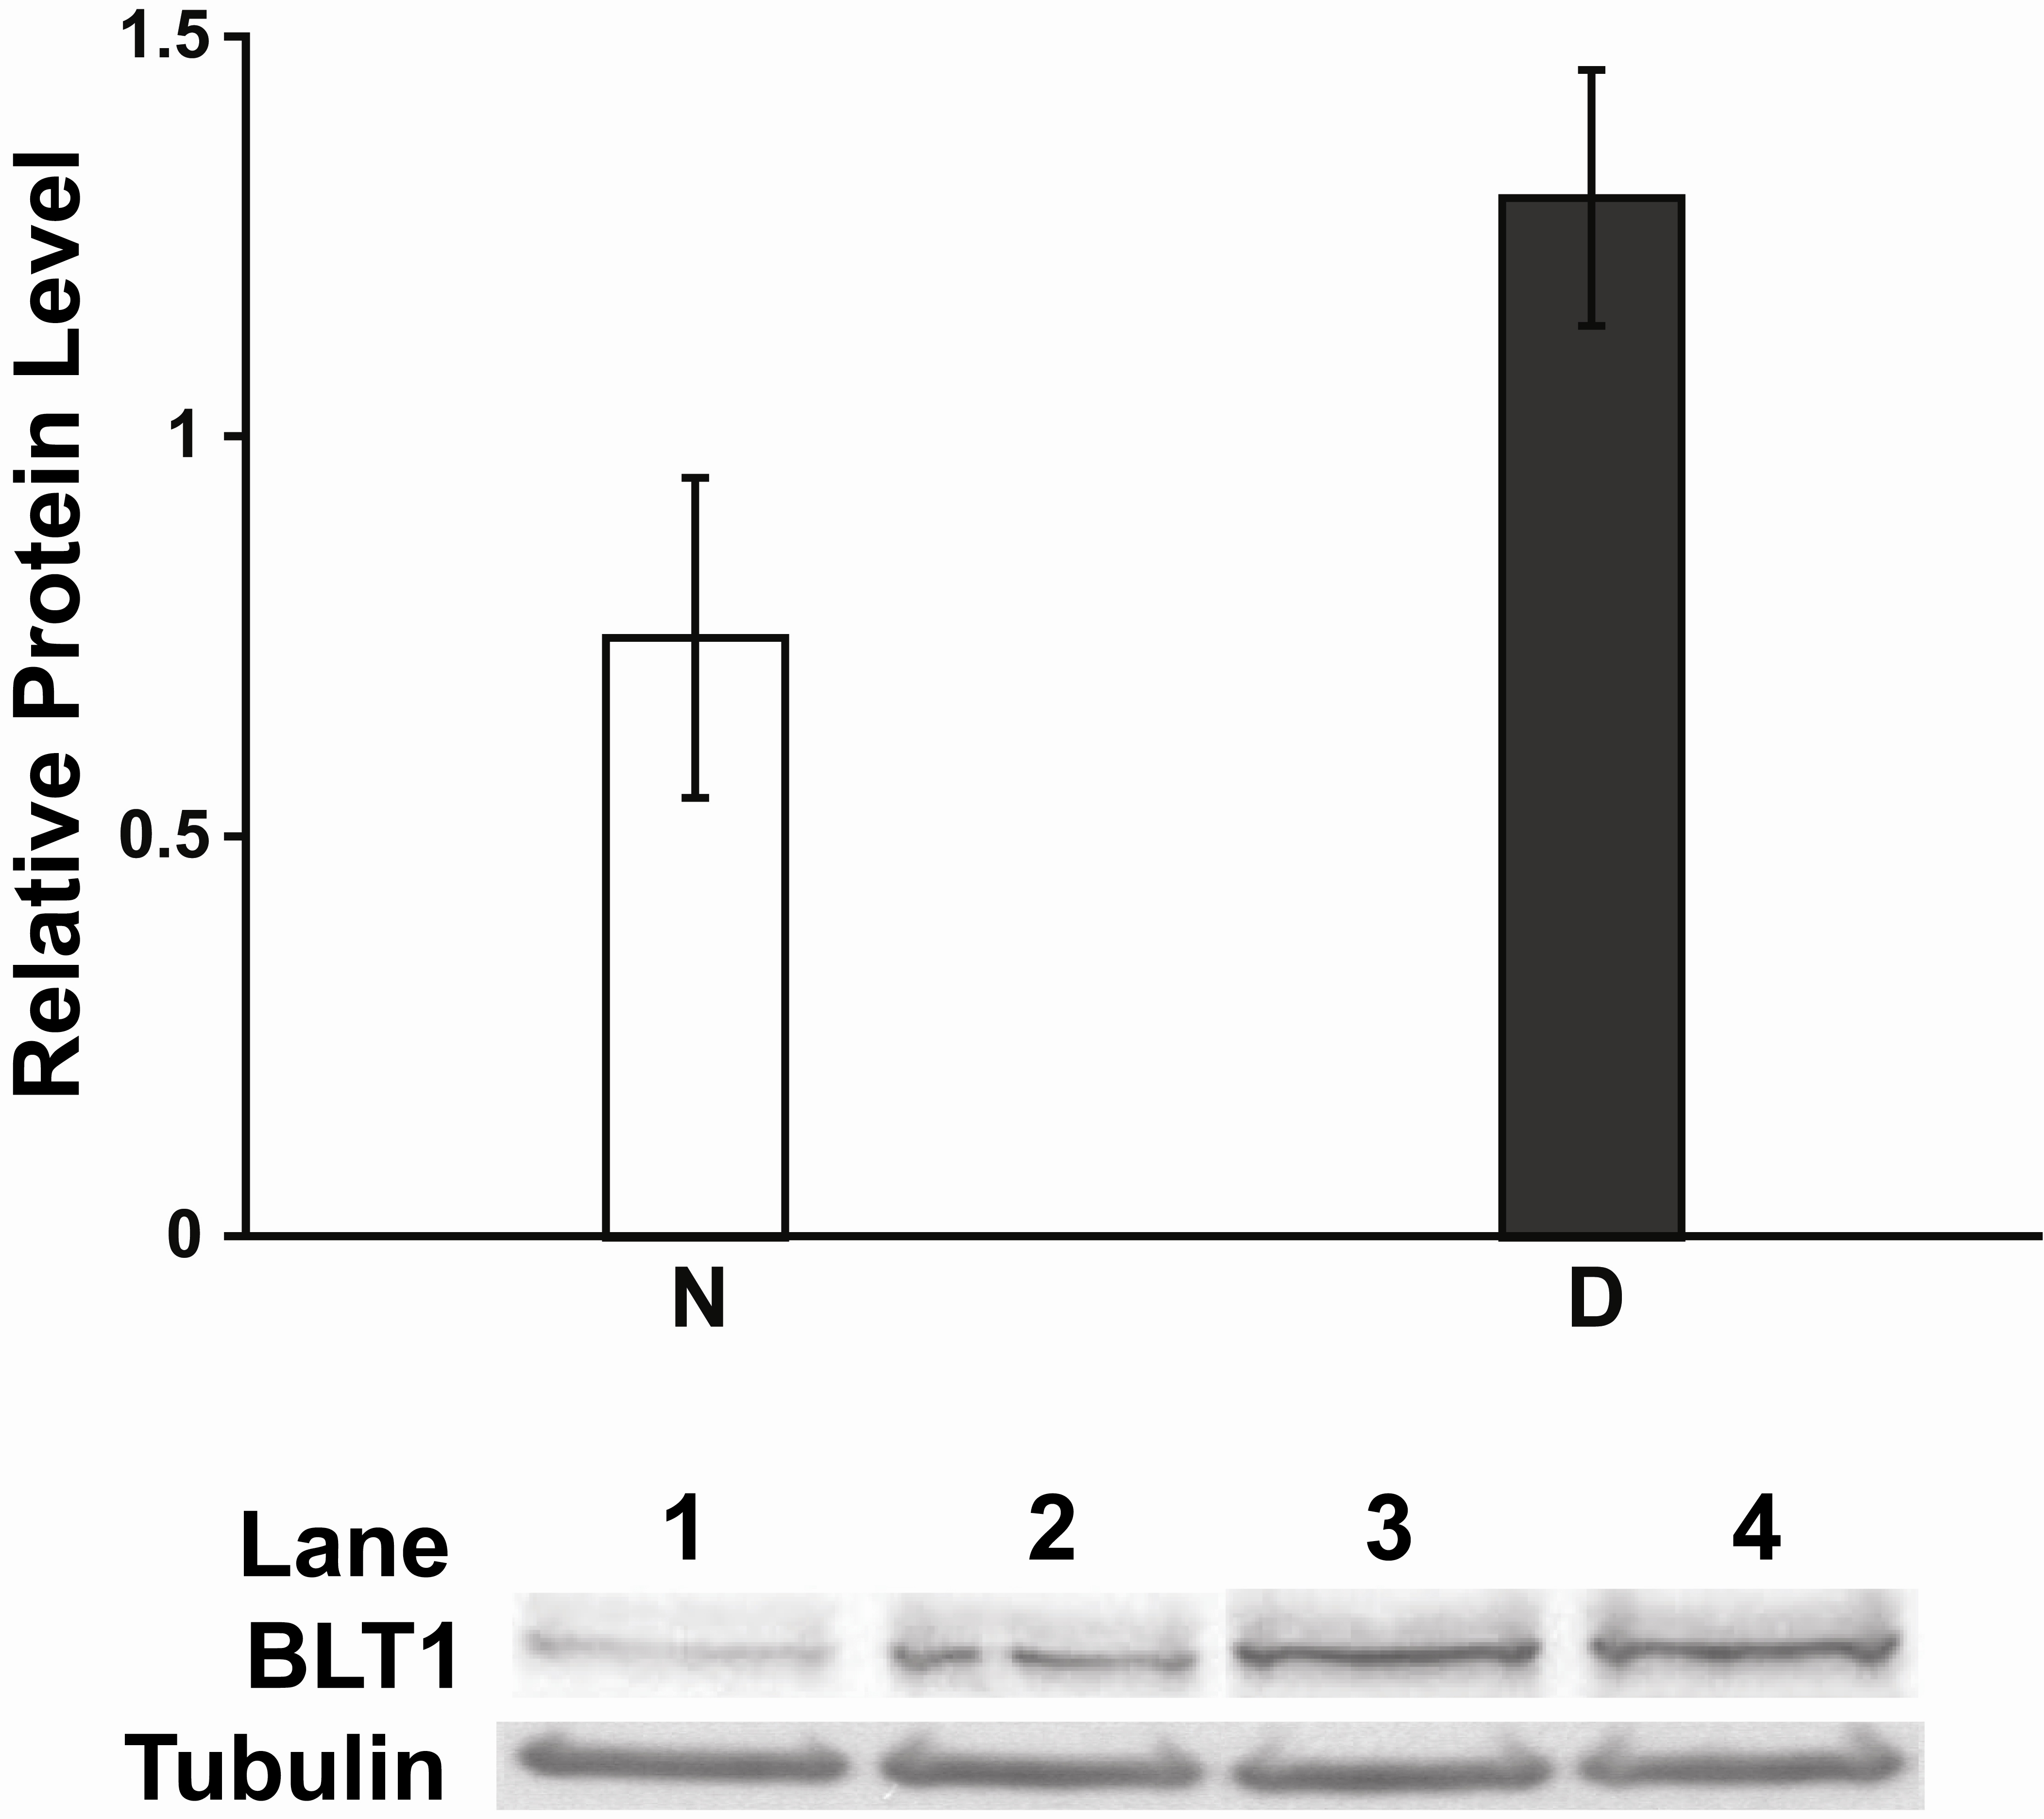
**

**FIGURE 6**

Supplement: db07-1217figures.doc [file db07-1217figures.doc]
